# Supplementary material for: Toward an integrated framework of corporate venturing for organizational ambidexterity as a dynamic capability
Source: Springer Nature journal article supplement (doi:10.1007/s11301-021-00223-y), 2021-06-05
Supplement: MOESM1 [file 19233014]

**Appendix I: Keyword list**

| <b>Corporate Venturing (CV)</b> |                                    | <b>Dynamic capabilities (DC)</b> |                                | <b>Organizational Ambidexterity (OA)</b> |                                       |
|---------------------------------|------------------------------------|----------------------------------|--------------------------------|------------------------------------------|---------------------------------------|
| <i>Main keywords</i>            | <i>Specific</i>                    | <i>Main keywords</i>             | <i>Specific</i>                | <i>Main keywords</i>                     | <i>Specific</i>                       |
| Corporate ventur*               | Open Innovation                    | Dynamic capabilities             | sensing, seizing, transforming | Organizational ambidexterity             | Structural ambidexterity              |
| New venture development         | Innovation lab                     | Dynamic capability               | sensing, seizing reconfigur*   | Organisational ambidexterity             | Contextual ambidexterity              |
| Corporate entrepreneurship      | Digital lab                        | Organizational capabilities      | sensing, Seizing, renew*       | exploration exploitation                 | Sequential ambidexterity              |
|                                 | Innovation hub                     | Organisational capabilities      |                                | exploring exploiting                     | Ambidextrous leadership               |
|                                 | Corporate accelerator              |                                  |                                |                                          | opportunity-seeking advantage-seeking |
|                                 | Venture Client                     |                                  |                                |                                          |                                       |
|                                 | Corporate venture capital /CVC     |                                  |                                |                                          |                                       |
|                                 | Internal corporate venturing / ICV |                                  |                                |                                          |                                       |
|                                 | New venture division/ NVD          |                                  |                                |                                          |                                       |
|                                 | Incubator, Incubation              |                                  |                                |                                          |                                       |
|                                 | Scale-up                           |                                  |                                |                                          |                                       |
| Spin-out/-off/-along/-in        |                                    |                                  |                                |                                          |                                       |
