# Supplementary material for: Toward an integrated framework of corporate venturing for organizational ambidexterity as a dynamic capability
Source: Springer Nature journal article supplement (doi:10.1007/s11301-021-00223-y), 2021-06-05
Supplement: MOESM3 [file 19233014]

### Appendix III: Coding scheme

| Source                                                           | Key concepts                         | Conceptualization                                  | Integration                                                             |
|------------------------------------------------------------------|--------------------------------------|----------------------------------------------------|-------------------------------------------------------------------------|
| <i>(predefined)</i>                                              | <i>(predefined)</i>                  | <i>(derived from RQ and context)</i>               | <i>(derived from analysis)</i>                                          |
| Year                                                             | DC background<br><i>(summary)</i>    | OA - DC intersection<br><i>(specific findings)</i> | OA logic<br><i>(trade-off view - paradox view)</i>                      |
| Focus category<br><i>(DC, OA, CV/CE)</i>                         | OA background<br><i>(summary)</i>    | CV - DC intersection<br><i>(specific findings)</i> | DC logic<br><i>(structures/processes - individual behaviour)</i>        |
| Method<br><i>(review, conceptual, qualitative, quantitative)</i> | CE/CV background<br><i>(summary)</i> | CV - OA intersection<br><i>(specific findings)</i> | CV setup<br><i>(separated, integrated, semi-structured, contextual)</i> |
| Research Design<br><i>(specifications)</i>                       |                                      |                                                    | CV descriptions<br><i>(summary)</i>                                     |
| Key findings<br><i>(summary)</i>                                 |                                      |                                                    |                                                                         |
