# Supplementary material for: Toward an integrated framework of corporate venturing for organizational ambidexterity as a dynamic capability
Source: Springer Nature journal article supplement (doi:10.1007/s11301-021-00223-y), 2021-06-05
Supplement: MOESM4 [file 19233014]

**Appendix IV: Concept matrix DC-OA-CV intersections (analysis)**

| Source                                    | DC background | OA background | CV/CE background | OA-DC intersection | CV-DC intersection | CV-OA intersection |
|-------------------------------------------|---------------|---------------|------------------|--------------------|--------------------|--------------------|
| Adner & Helfat, 2003                      | x             |               |                  |                    |                    |                    |
| Akwei, Peppard & Hughes, 2008             | x             |               |                  |                    |                    |                    |
| Alänge & Steiber, 2018                    |               |               |                  |                    |                    | x                  |
| Almahendra & Ambs, 2014                   |               | x             |                  |                    |                    |                    |
| Ambrosini & Bowman, 2009                  | x             |               |                  |                    | x                  |                    |
| Anand, Oriani & Vassolo, 2010             |               |               |                  |                    | x                  |                    |
| Andriopoulos & Lewis, 2009                |               | x             |                  |                    |                    | x                  |
| Anil et al., 2006                         |               | x             |                  |                    |                    | x                  |
| Arend & Bromiley, 2009                    | x             |               |                  |                    | x                  |                    |
| Baden-Fuller & Volberda, 1997             |               |               |                  |                    |                    | x                  |
| Barney, 1991                              | x             |               |                  |                    |                    |                    |
| Barney, Wright & Kretchen, 2001           | x             |               |                  |                    |                    |                    |
| Barreto, 2010                             | x             |               |                  |                    |                    |                    |
| Battistini, Hacklin & Baschera, 2013      |               |               | x                |                    |                    | x                  |
| Benner & Tuschman, 2003                   |               | x             |                  | x                  |                    | x                  |
| Bierwerth, Schwens & Isidor, 2015         |               |               | x                |                    |                    |                    |
| Birkinshaw & Gupta, 2013                  |               |               |                  |                    |                    | x                  |
| Birkinshaw, Batenburg & Murray, 2002      |               |               | x                |                    |                    | x                  |
| Birkinshaw, Zimmermann & Raisch, 2016     |               |               |                  | x                  |                    | x                  |
| Blindenbach-Driessen & Van den Ende, 2014 |               |               |                  |                    |                    | x                  |

| Source                              | DC background | OA background | CV/CE background | OA-DC intersection | CV-DC intersection | CV-OA intersection |
|-------------------------------------|---------------|---------------|------------------|--------------------|--------------------|--------------------|
| Breznik & Hisrich, 2014             |               |               |                  |                    | x                  |                    |
| Burgelman & Välikangas, 2005        |               |               | x                |                    |                    | x                  |
| Burgelman, 1983                     |               |               | x                |                    | x                  | x                  |
| Burgelman, 1984a                    |               |               | x                |                    |                    |                    |
| Burgelman, 1984b                    |               |               | x                |                    |                    | x                  |
| Burgelman, 1985                     |               |               | x                |                    |                    | x                  |
| Burgers & Jansen, 2008              |               | x             | x                |                    |                    | x                  |
| Callegari & Rai, 2021               |               | x             |                  |                    |                    |                    |
| Campbell et al., 2003               |               |               |                  |                    |                    | x                  |
| Cantarello, Martini & Nosella, 2012 |               |               |                  |                    |                    | x                  |
| Castiaux, 2012                      | x             |               |                  |                    |                    |                    |
| Cavusgil, Seggie & Talay, 2007      | x             |               |                  |                    |                    |                    |
| Chen, 2017                          |               | x             |                  |                    |                    | x                  |
| Chesbrough, 2000                    |               |               |                  |                    |                    | x                  |
| Chesbrough, 2002                    |               |               |                  |                    |                    | x                  |
| Christensen & Bower, 1996           |               |               |                  |                    |                    | x                  |
| Collis, 1994                        | x             |               |                  |                    |                    |                    |
| Corbett et al., 2013                |               |               | x                |                    |                    |                    |
| Covin & Miles, 1999                 |               |               | x                |                    |                    |                    |
| Covin & Miles, 2007                 |               |               | x                |                    | x                  | x                  |
| Covin et al., 2015                  |               |               |                  |                    |                    | x                  |
| Crockett, McGee & Payne, 2013       |               |               |                  |                    |                    | x                  |
| Du & Chen, 2018                     | x             | x             |                  |                    |                    | x                  |
| Dushnitsky & Birkinshaw, 2014       |               |               | x                |                    |                    | x                  |

| Source                                | DC background | OA background | CV/CE background | OA-DC intersection | CV-DC intersection | CV-OA intersection |
|---------------------------------------|---------------|---------------|------------------|--------------------|--------------------|--------------------|
| Easterby-Smith, Lyles & Peteraf, 2009 | x             |               |                  |                    |                    |                    |
| Eisenhardt & Martin, 2000             | x             |               |                  | x                  | x                  |                    |
| Eisenhardt, Furr & Bingham, 2010      |               | x             |                  |                    |                    | x                  |
| Enkel & Sagmeister, 2020              |               |               |                  |                    | x                  | x                  |
| Eriksson, 2014                        | x             |               |                  |                    | x                  |                    |
| Farjoun, 2010                         |               | x             |                  |                    |                    | x                  |
| Garrett & Neubaum, 2013               |               |               | x                |                    |                    | x                  |
| Gassmann & Becker, 2006               |               |               |                  |                    | x                  | x                  |
| Gibson & Birkinshaw, 2004             |               | x             |                  |                    |                    | x                  |
| Gilbert, 2006                         |               |               |                  |                    |                    | x                  |
| Gimmy et al., 2017                    |               |               | x                |                    |                    | x                  |
| Gonthier & Chirita, 2019              |               |               |                  |                    | x                  | x                  |
| Gupta, Smith & Shalley, 2006          |               | x             |                  |                    |                    | x                  |
| Gutmann et al., 2020                  |               |               |                  |                    |                    | x                  |
| Gutmann, 2019                         |               |               | x                |                    |                    | x                  |
| Gutmann, Kanbach & Seltmann, 2019     |               |               |                  |                    |                    | x                  |
| Helfat & Peteraf, 2009                | x             |               |                  |                    |                    |                    |
| Helfat & Winters, 2011                | x             |               |                  |                    | x                  |                    |
| Heracleous et al., 2017               |               |               |                  |                    |                    | x                  |
| Hill & Birkinshaw, 2005               |               |               | x                |                    |                    | x                  |
| Hill & Birkinshaw, 2006               |               |               |                  |                    |                    | x                  |
| Hill & Birkinshaw, 2008               |               |               | x                |                    |                    | x                  |
| Hill & Birkinshaw, 2012               |               | x             | x                |                    |                    | x                  |

| Source                                 | DC background | OA background | CV/CE background | OA-DC intersection | CV-DC intersection | CV-OA intersection |
|----------------------------------------|---------------|---------------|------------------|--------------------|--------------------|--------------------|
| Hill & Georgulas, 2016                 |               |               | x                |                    | x                  | x                  |
| Holotiuk & Beimborm, 2018              |               |               |                  |                    |                    | x                  |
| Ireland & Webb, 2007                   |               | x             | x                |                    |                    | x                  |
| Ireland, Covin & Kuratko, 2008         |               |               | x                |                    |                    |                    |
| Jansen et al., 2009                    |               |               |                  | x                  |                    | x                  |
| Jansen, Simsek & Cao, 2012             |               | x             |                  |                    |                    | x                  |
| Jansen, Van den Bosch & Volberda, 2006 |               |               | x                |                    |                    | x                  |
| Jones & Kraft, 2004                    |               |               | x                |                    |                    | x                  |
| Jurksiene & Pundziene, 2016            |               |               |                  | x                  |                    |                    |
| Kanbach & Stubner, 2016                |               |               |                  |                    |                    | x                  |
| Kanter, 1985                           |               | x             |                  |                    |                    | x                  |
| Katkalo, Pitelis & Teece, 2010         | x             |               |                  | x                  | x                  |                    |
| Keil et al., 2008                      |               |               |                  |                    |                    | x                  |
| Keil, 2001                             |               |               | x                |                    |                    | x                  |
| Kodama, 2017                           |               |               |                  | x                  |                    |                    |
| Koza & Lewin, 2000                     |               |               | x                |                    |                    | x                  |
| Kruft & Kock, 2019                     |               |               | x                |                    |                    | x                  |
| Kupp, Marval & Borchers, 2017          |               |               |                  |                    |                    | x                  |
| Kuratko & Audtretsch, 2013             |               |               | x                |                    |                    |                    |
| Kuratko & Morris, 2003                 | x             |               |                  |                    | x                  | x                  |
| Kuratko, 2010                          |               |               | x                |                    |                    | x                  |
| Kuratko, Covin & Garrett, 2009         |               |               | x                |                    |                    | x                  |
| Kuratko, Covin & Hornsby, 2014         |               |               | x                |                    |                    | x                  |

| Source                                             | DC background | OA background | CV/CE background | OA-DC intersection | CV-DC intersection | CV-OA intersection |
|----------------------------------------------------|---------------|---------------|------------------|--------------------|--------------------|--------------------|
| Kuratko, Hornsby & Hayton, 2015                    |               |               | x                |                    |                    |                    |
| Lavie & Rosenkopf, 2006                            |               | x             |                  |                    |                    | x                  |
| Lavie, Stettner & Tushman                          |               | x             |                  |                    |                    | x                  |
| Lawson & Samson, 2001                              |               |               |                  |                    | x                  |                    |
| Leiblein, 2011                                     | x             |               |                  |                    |                    |                    |
| Leten & Dyck, 2012                                 |               | x             | x                |                    |                    | x                  |
| Lubatkin et al., 2006                              |               |               |                  |                    |                    | x                  |
| Madsen, 2010                                       | x             | x             |                  | x                  | x                  |                    |
| Magnusson & Martini, 2012                          |               |               | x                |                    |                    |                    |
| Mahdjour & Fischer, 2014                           |               |               |                  |                    |                    | x                  |
| Majumdar, 2000                                     | x             |               |                  |                    |                    |                    |
| March, 1991                                        |               | x             |                  |                    |                    | x                  |
| Marín-Idárraga, Hurtado-González, & Cabello (2016) |               | x             |                  | x                  |                    | x                  |
| Martin & Eisenhardt, 2004                          |               |               |                  |                    | x                  | x                  |
| Martini et al., 2013                               |               |               |                  |                    |                    | x                  |
| Mathias, 2014                                      |               | x             |                  |                    |                    |                    |
| McGrath, Keil & Tukainen, 2006                     |               |               |                  |                    |                    | x                  |
| Michl, Gold & Picot, 2012                          |               |               | x                |                    |                    | x                  |
| Miles & Covin, 2002                                |               |               |                  |                    |                    | x                  |
| Moreno et al., 2015                                |               |               |                  |                    |                    | x                  |
| Moschner & Herstatt, 2018                          |               |               | x                |                    |                    | x                  |
| Narayanan, Yang & Zahra, 2009                      |               |               | x                |                    |                    | x                  |
| O'Reilly & Tushman, 2004                           |               | x             |                  |                    |                    |                    |

| Source                                  | DC background | OA background | CV/CE background | OA-DC intersection | CV-DC intersection | CV-OA intersection |
|-----------------------------------------|---------------|---------------|------------------|--------------------|--------------------|--------------------|
| O'Reilly & Tushman, 2013                |               |               | x                | x                  |                    | x                  |
| O'Cass, Heirato & Ngo, 2014             |               |               |                  |                    |                    | x                  |
| O'Connor & DeMartino, 2006              |               |               |                  |                    |                    | x                  |
| O'Hare et al., 2008                     |               |               |                  |                    |                    | x                  |
| O'Reilly & Tushman, 1996                |               | x             |                  |                    |                    | x                  |
| O'Reilly & Tushman, 2008                | x             | x             |                  | x                  |                    | x                  |
| O'Reilly & Tushman, 2011                | x             | x             |                  | x                  |                    | x                  |
| O'Reilly, Harreld & Tushman, 2009       |               |               | x                | x                  |                    | x                  |
| Papachroni, Heracleous & Paroutis, 2014 |               |               |                  |                    |                    | x                  |
| Pavlou & El Sawy, 2011                  |               |               |                  | x                  | x                  |                    |
| Pisano, 2017                            | x             |               |                  |                    |                    |                    |
| Pitelis, 2009                           |               | x             |                  |                    |                    |                    |
| Popadiuk, Luz & Kretschmer, 2018        |               |               |                  | x                  |                    |                    |
| Raisch & Birkinshaw, 2008               |               | x             |                  | x                  |                    |                    |
| Raisch & Tushman, 2016                  |               |               | x                |                    |                    | x                  |
| Raisch et al., 2009                     |               | x             |                  | x                  |                    | x                  |
| Raisch, 2008                            |               | x             |                  |                    |                    | x                  |
| Reimbach & Hauschild, 2012              |               |               | x                |                    |                    | x                  |
| Rigtering & Behrens, 2021               |               |               |                  |                    | x                  |                    |
| Rohrbeck, Döhler & Arnold, 2009         |               |               |                  |                    |                    | x                  |
| Rossi et al., 2019                      |               |               |                  |                    |                    | x                  |
| Sakhdari, 2016                          |               |               | x                |                    |                    |                    |
| Sarkees & Hulland, 2009                 |               |               |                  |                    |                    | x                  |

| Source                             | DC background | OA background | CV/CE background | OA-DC intersection | CV-DC intersection | CV-OA intersection |
|------------------------------------|---------------|---------------|------------------|--------------------|--------------------|--------------------|
| Schildt, Maula & Keil, 2005        |               |               |                  |                    |                    | x                  |
| Schilke, Hu & Helfat, 2018         | x             |               |                  |                    |                    |                    |
| Schuh, Lau & Herding, 2017         |               | x             |                  |                    |                    | x                  |
| Sharma & Chrisman, 1999            |               |               | x                |                    | x                  |                    |
| Shaw, O'Loughlin & McFadzean, 2005 |               |               | x                |                    |                    |                    |
| Shin & Cho, 2020                   |               |               |                  |                    |                    | x                  |
| Shoemaker, Heaton & Teece, 2018    | x             |               |                  |                    |                    |                    |
| Simsek et al., 2009                |               | x             |                  |                    |                    | x                  |
| Snehvrat et al., 2018              |               | x             |                  | x                  |                    | x                  |
| Taródy, 2016                       |               | x             |                  |                    |                    | x                  |
| Taylor & Helfat, 2009              |               |               |                  |                    |                    | x                  |
| Teece & Augier, 2009               | x             |               |                  |                    | x                  |                    |
| Teece & Pisano, 1994               | x             |               |                  | x                  |                    |                    |
| Teece, 2007                        | x             |               |                  | x                  | x                  |                    |
| Teece, 2014                        | x             |               |                  |                    |                    |                    |
| Teece, 2018                        | x             |               |                  |                    |                    |                    |
| Teece, 2020                        | x             |               |                  |                    |                    |                    |
| Teece, Pisano & Shuen, 1997        | x             |               |                  |                    |                    |                    |
| Thornhill & Amit, 2001             |               |               |                  |                    |                    | x                  |
| Tidd & Tauriin, 1999               |               |               |                  |                    |                    | x                  |
| Titus, House & Covin, 2017         |               |               |                  |                    |                    | x                  |
| Turner, Swart & Maylor, 2013       |               | x             |                  |                    |                    |                    |
| Tushman et al., 2010               |               |               |                  |                    |                    | x                  |
| Vanhaverbeke & Peeters, 2005       |               |               |                  |                    | x                  | x                  |

| Source                      | DC background | OA background | CV/CE background | OA-DC intersection | CV-DC intersection | CV-OA intersection |
|-----------------------------|---------------|---------------|------------------|--------------------|--------------------|--------------------|
| Vogel & Güttel, 2012        |               |               |                  | x                  |                    |                    |
| Wang & Ahmed, 2007          |               |               |                  | x                  |                    |                    |
| Weiblein & Chesbrough, 2015 |               |               | x                |                    |                    | x                  |
| Westerman & McFarlan, 2006  |               |               |                  |                    |                    | x                  |
| Williams & Lee, 2009        |               |               |                  |                    | x                  | x                  |
| Winter, 2003                | x             |               |                  |                    | x                  |                    |
| Wolcott & Lippitz, 2007     |               |               | x                |                    |                    | x                  |
| Wulf, Stubner & Blarr, 2010 |               |               |                  |                    |                    | x                  |
| Yang, Cul & Pan, 2016       |               |               |                  |                    |                    | x                  |
| Zahra & Sapienza, 2006      |               |               |                  |                    | x                  |                    |
| Zahra, 1991                 |               |               | x                |                    | x                  | x                  |
| Zollo & Winter, 2002        | x             |               |                  | x                  |                    |                    |
