# Supplementary material for: Toward an integrated framework of corporate venturing for organizational ambidexterity as a dynamic capability
Source: Springer Nature journal article supplement (doi:10.1007/s11301-021-00223-y), 2021-06-05
Supplement: MOESM5 [file 19233014]

**Appendix V: Concept matrix CV for OA as a DC (results)**

| Source                                                        | Organizational ambidexterity logic (from analysis) |                                                 | Dynamic capability logic (from analysis)    |                                        | CV setup                 |
|---------------------------------------------------------------|----------------------------------------------------|-------------------------------------------------|---------------------------------------------|----------------------------------------|--------------------------|
|                                                               | <i>Trade-off view<br/>(system level)</i>           | <i>Paradox view<br/>(unit/individual level)</i> | <i>Organizational structures/ processes</i> | <i>Individual behaviour / routines</i> |                          |
| Alänge et al., 2018                                           |                                                    | x                                               | x                                           |                                        | interlinked-ambidextrous |
| Andriopoulos & Lewis, 2009                                    |                                                    | x                                               |                                             | x                                      | contextual-ambidextrous  |
| Baden-Fuller & Volberda, 1997                                 | x                                                  |                                                 | x                                           |                                        | separated                |
| Birkinshaw, Zimmermann & Raisch, 2016                         | x                                                  |                                                 |                                             | x                                      | separated-integrated     |
| Burgelman & Valikangas, 2005                                  |                                                    | x                                               | x                                           |                                        | interlinked-ambidextrous |
| Burgelman, 1985                                               |                                                    | x                                               | x                                           |                                        | interlinked-ambidextrous |
| Cantarello, Martini, & Nosella, 2012                          |                                                    | x                                               | x                                           |                                        | interlinked-ambidextrous |
| Chesbrough, 2000                                              |                                                    | x                                               | x                                           |                                        | interlinked-ambidextrous |
| Chesbrough, 2002                                              |                                                    | x                                               | x                                           |                                        | interlinked-ambidextrous |
| Christensen & Bower, 1996                                     | x                                                  | ...                                             | x                                           |                                        | separated                |
| Du & Chen, 2018                                               |                                                    | x                                               | x                                           |                                        | interlinked-ambidextrous |
| Enkel & Sagmeister, 2020                                      |                                                    | x                                               | x                                           |                                        | interlinked-ambidextrous |
| Galunic & Eisenhardt, 2001<br>(in: Eisenhardt & Martin, 2004) |                                                    | x                                               | x                                           |                                        | interlinked-ambidextrous |
| Gassmann & Becker, 2004                                       |                                                    | x                                               | x                                           |                                        | interlinked-ambidextrous |
| Gilbert, 2006                                                 | x                                                  |                                                 |                                             | x                                      | separated-integrated     |
| Gimmy et al., 2017                                            |                                                    | x                                               | x                                           |                                        | interlinked-ambidextrous |
| Gutmann et al., 2020                                          |                                                    | x                                               | x                                           |                                        | interlinked-ambidextrous |
| Gutmann, Kanbach & Seltman, 2019                              |                                                    | x                                               | x                                           |                                        | interlinked-ambidextrous |
| Heracleous et al., 2017                                       | x                                                  |                                                 | x                                           |                                        | separated                |
| Holotiuk & Beimborn, 2018                                     |                                                    | x                                               | x                                           |                                        | interlinked-ambidextrous |
| Jones & Kraft, 2004                                           | x                                                  |                                                 | x                                           |                                        | separated                |
| Kanbach & Stubner, 2016                                       | x                                                  |                                                 |                                             | x                                      | separated-integrated     |
| Kupp, Marval & Borchers, 2017                                 | x                                                  |                                                 |                                             | x                                      | separated-integrated     |
| Leten & Dyck, 2015                                            |                                                    | x                                               | x                                           |                                        | interlinked-ambidextrous |
| Mahdjour & Fischer, 2014                                      | x                                                  |                                                 |                                             | x                                      | separated-integrated     |

| Source                           | Organizational ambidexterity logic (from analysis) |                                                 | Dynamic capability logic (from analysis)    |                                        | CV setup                                                            |
|----------------------------------|----------------------------------------------------|-------------------------------------------------|---------------------------------------------|----------------------------------------|---------------------------------------------------------------------|
|                                  | <i>Trade-off view<br/>(system level)</i>           | <i>Paradox view<br/>(unit/individual level)</i> | <i>Organizational structures/ processes</i> | <i>Individual behaviour / routines</i> | <i>separated, separated-integrated,<br/>contextual, interlinked</i> |
| McGrath, Keil & Tikiainen, 2006  |                                                    | x                                               | x                                           |                                        | interlinked-ambidextrous                                            |
| Michl, Gold, & Picot, 2012       |                                                    | x                                               | x                                           |                                        | interlinked-ambidextrous                                            |
| Miles & Covin, 2002              |                                                    | x                                               |                                             | x                                      | contextual-ambidextrous                                             |
| Miles & Covin, 2007              | x                                                  |                                                 | x                                           |                                        | separated                                                           |
| Miles & Covin, 2007              |                                                    | x                                               | x                                           |                                        | interlinked-ambidextrous                                            |
| Miles & Covin, 2007              |                                                    | x                                               |                                             | x                                      | contextual-ambidextrous                                             |
| Moschner & Herstatt, 2018        | x                                                  |                                                 | x                                           |                                        | separated                                                           |
| O'Connor & DeMartino, 2006       |                                                    | x                                               | x                                           |                                        | interlinked-ambidextrous                                            |
| O'Hare et al., 2008              |                                                    | x                                               | x                                           |                                        | interlinked-ambidextrous                                            |
| O'Reilly & Tushman, 2004         | x                                                  |                                                 |                                             | x                                      | separated-integrated                                                |
| O'Reilly & Tushman, 2011         | x                                                  |                                                 |                                             | x                                      | separated-integrated                                                |
| O'Reilly, Harrel & Tushman, 2009 | x                                                  |                                                 |                                             | x                                      | separated-integrated                                                |
| Raisch & Tushman, 2016           |                                                    | x                                               | x                                           |                                        | interlinked-ambidextrous                                            |
| Raisch, 2008                     |                                                    | x                                               | x                                           |                                        | interlinked-ambidextrous                                            |
| Shin & Cho, 2020                 |                                                    | x                                               | x                                           |                                        | interlinked-ambidextrous                                            |
| Taylor & Helfat, 2009            |                                                    | x                                               | x                                           |                                        | interlinked-ambidextrous                                            |
| Tidd, J., & Taurins, S., 1999    |                                                    | x                                               | x                                           |                                        | interlinked-ambidextrous                                            |
| Tushman & O'Reilly, 1996         | x                                                  |                                                 |                                             | x                                      | separated-integrated                                                |
| Tushman et al., 2010             | x                                                  |                                                 | x                                           |                                        | separated                                                           |
| Tushman et al., 2010             | x                                                  |                                                 |                                             | x                                      | separated-integrated                                                |
| Van Haverbeke & Peeters, 2005    |                                                    | x                                               | x                                           |                                        | interlinked-ambidextrous                                            |
| Weiblen & Chesbrough, 2015       |                                                    | x                                               | x                                           |                                        | interlinked-ambidextrous                                            |
| Westerman & McFarlan, 2006       |                                                    | x                                               | x                                           |                                        | interlinked-ambidextrous                                            |
| Wolcott & Lippitz, 2007          |                                                    | x                                               |                                             | x                                      | contextual-ambidextrous                                             |
